# Supplementary material
Source: publisher figshare collection journal article supplement (https://asha.figshare.com/articles/dataset/_/25996168)
Supplement: Supplementary file 1 [file 1]

#### **Supplemental Material S4.** Fidelity regarding variability and uniqueness of lexical items.

The variability and uniqueness of lexical items used in intervention was judged according to whether more than ten different root words were used for each morphological target or ten different verbs for each syntactic structure. This was achieved for 100% of targets and sessions, with the exception of one target (verbs requiring three obligatory arguments), where three out of five of the analyzed sessions working on this target did include ten or more different verbs and the others included nine or six different verbs respectively. This was achieved because, although all three arguments are obligatory for very few verbs (e.g., *I put the book on the table*), other verbs can use this structure, but the prepositional phrase is optional. Several of these verbs were included in the sessions e.g., *The elephant carried the bean bag (to the treasure chest)*. Optimal fidelity (100%) was achieved across all targets for ensuring that no more than half of items which appeared in probe tests were also employed during intervention sessions.
