# Supplementary material
Source: publisher figshare collection journal article supplement (https://asha.figshare.com/articles/dataset/_/25996168)
Supplement: Supplementary file 2 [file 1]

**Supplemental Material S2.** Three example probe tests (score sheets only shown here, each probe test includes a PowerPoint presentation with pictures).

## NG2 "not" after diamond

Model: "The banana is yellow but..... the apple is not yellow. Can you say that?"

Practice item: The man is walking but..... Target: *The lady is not walking*

| Item                                                                          | Target                            | Response | Score |
|-------------------------------------------------------------------------------|-----------------------------------|----------|-------|
| 1                                                                             | this boy is not yawning           |          |       |
| 2                                                                             | this ball is not on the table     |          |       |
| 3                                                                             | this man is not clapping          |          |       |
| 4                                                                             | the lady is not angry             |          |       |
| 5                                                                             | this bird is not flying           |          |       |
| 6                                                                             | this house is not in the box      |          |       |
| 7                                                                             | the ice cream is not hot          |          |       |
| 8                                                                             | this girl is not under the bridge |          |       |
| 9                                                                             | the ladder is not square          |          |       |
| 10                                                                            | the girl is not drinking          |          |       |
| Score 0 if auxiliary/copula and/or "not" omitted, or if appear in wrong order |                                   |          | TOTAL |

## Q16 Who and what movement in questions

Model: Mrs Jones asks lots of questions. Today she is asking about the thing or person under the blue box (point): For example, "the girl is kicking something". Mrs Jones asks 'what' – "What is the girl kicking?" Can you ask that?

Practice item: The man is pushing someone. Mrs Jones asks "who". She says.... Prompt: "who....." Target: *who is the man pushing?*

| Type                                      | Item | Target                                   | Response | Score |
|-------------------------------------------|------|------------------------------------------|----------|-------|
| SVO                                       | 1    | Who is the man kissing?                  |          |       |
| SVO                                       | 2    | Who is the man chasing?                  |          |       |
| PP:SVA                                    | 3    | What is the mug on?                      |          |       |
| SVO(A)                                    | 4    | What is the lady pouring (into the cup)? |          |       |
| SVOA                                      | 5    | What is the lady putting in the machine? |          |       |
| SVOA                                      | 6    | What is the lady sticking on the wall?   |          |       |
| PP:SVOA                                   | 7    | Who is she putting the nappy on?         |          |       |
| PP:SVOA                                   | 8    | What are they putting the rubbish in?    |          |       |
| SVOO                                      | 9    | What is the man feeding the baby?        |          |       |
| How:SVOA                                  | 10   | What is she spreading the butter with?   |          |       |
| Score n/a if no attempt to ask a question |      |                                          |          | TOTAL |

### AG3 Plural aux/cop past tense TESTING FOR USE OF PLURAL COP/ AUX (with plural subject)

**NB. Do not test if child does not mark plurals in Subject**

Model: We are going to talk about things that happened before now. We are going to talk about yesterday or last week.

"Yesterday, the puppies were sleeping". Can you say that?

Practice item: The boys were playing football.

| Type                                                                                                                           | Item | Target                                | Response | Score |
|--------------------------------------------------------------------------------------------------------------------------------|------|---------------------------------------|----------|-------|
| reg pl                                                                                                                         | 1    | The bottles were empty.               |          |       |
| reg pl                                                                                                                         | 2    | The flowers were gorgeous/alive/red.  |          |       |
| reg pl                                                                                                                         | 3    | The toys were on the bed.             |          |       |
| reg pl                                                                                                                         | 4    | The balls were on the table.          |          |       |
| reg pl                                                                                                                         | 5    | The girls were jumping.               |          |       |
| reg pl                                                                                                                         | 6    | The boys were reading a book.         |          |       |
| irreg pl                                                                                                                       | 7    | The people were listening (to music). |          |       |
| irreg pl                                                                                                                       | 8    | The men were laughing.                |          |       |
| irreg pl                                                                                                                       | 9    | The people were clapping.             |          |       |
| irreg pl                                                                                                                       | 10   | The sheep were eating.                |          |       |
| Score 0 for singular past tense aux/cop with plural subject. Score N/A for pl. present tense aux/cop or omitted aux/cop. TOTAL |      |                                       |          |       |
