# Supplementary material
Source: publisher figshare collection journal article supplement (https://asha.figshare.com/articles/dataset/_/25996168)
Supplement: Supplementary file 3 [file 1]

**Supplemental Material S3.** Summary of timings within video-recorded intervention sessions (raw data in seconds).

| Child and session no. | Recording length | Time on Target 1 | Time on Target 2 | Total time on targets | General intro | T1-T2 transition | Child distraction | Tech problems | Interruptions | Other | Total non-target time |
|-----------------------|------------------|------------------|------------------|-----------------------|---------------|------------------|-------------------|---------------|---------------|-------|-----------------------|
| ID6, 1                | 1233             | 610              | 528              | 1138                  | 11            | 34               | 50                | 0             | 0             | 0     | 95                    |
| ID7, 1                | 1581             | 689              | 853              | 1542                  | 28            | 11               | 0                 | 0             | 0             | 0     | 39                    |
| ID5, 1                | 1917             | 1362             | 511              | 1873                  | 40            | 4                | 0                 | 0             | 0             | 0     | 44                    |
| ID2, 1                | 1663             | 980              | 528              | 1508                  | 80            | 5                | 70                | 0             | 0             | 0     | 155                   |
| ID3, 2                | 1441             | 408              | 935              | 1343                  | 82            | 16               | 0                 | 0             | 0             | 0     | 98                    |
| ID4, 2                | 2319             | 1506             | 759              | 2265                  | 39            | 0                | 15                | 0             | 0             | 0     | 54                    |
| ID6, 4                | 1487             | 517              | 816              | 1333                  | 15            | 53               | 86                | 0             | 0             | 0     | 154                   |
| ID7, 2                | 1572             | 727              | 822              | 1549                  | 15            | 8                | 0                 | 0             | 0             | 0     | 23                    |
| ID1,4                 | 1320             | 328              | 923              | 1251                  | 11            | 24               | 0                 | 34            | 0             | 0     | 69                    |
| ID8, 4                | 1297             | 756              | 432              | 1188                  | 24            | 10               | 75                | 0             | 0             | 0     | 109                   |
| ID8, 6                | 1471             | 718              | 713              | 1431                  | 30            | 10               | 0                 | 0             | 0             | 0     | 40                    |
| ID5, 6                | 1375             | 188              | 645              | 833                   | 88            | 42               | 412               | 0             | 0             | 0     | 542                   |
| ID2, 3                | 1718             | 1078             | 633              | 1711                  | 7             | 0                | 0                 | 0             | 0             | 0     | 7                     |
| ID3, 5                | 1321             | 852              | 421              | 1273                  | 15            | 33               | 0                 | 0             | 0             | 0     | 48                    |
| ID4, 5                | 1381             | 527              | 821              | 1348                  | 4             | 29               | 0                 | 0             | 0             | 0     | 33                    |
| ID1, 6                | 1118             | 311              | 719              | 1030                  | 23            | 17               | 0                 | 48            | 0             | 0     | 88                    |
| ID8, 10               | 1051             | 454              | 471              | 925                   | 110           | 16               | 0                 | 0             | 0             | 0     | 126                   |
|                       | 1563             | 823              | 623              | 1446                  | 108           | 9                | 0                 | 0             | 0             | 0     | 117                   |

| Child and session no. | Recording length | Time on Target 1 | Time on Target 2 | Total time on targets | General intro | T1-T2 transition | Child distraction | Tech problems | Interruptions | Other | Total non-target time |
|-----------------------|------------------|------------------|------------------|-----------------------|---------------|------------------|-------------------|---------------|---------------|-------|-----------------------|
| ID1, 13               |                  |                  |                  |                       |               |                  |                   |               |               |       |                       |
| ID7, 15               | 1637             | 811              | 740              | 1551                  | 35            | 0                | 0                 | 0             | 51            | 0     | 86                    |
| ID2, 14               | 1410             | 407              | 905              | 1312                  | 48            | 25               | 0                 | 0             | 0             | 25    | 98                    |
| ID6, 6                | 1626             | 698              | 777              | 1475                  | 0             | 34               | 117               | 0             | 0             | 0     | 151                   |
| ID3, 7                | 1215             | 824              | 350              | 1174                  | 41            | 0                | 0                 | 0             | 0             | 0     | 41                    |
| ID4, 8                | 1671             | 726              | 917              | 1643                  | 10            | 18               | 0                 | 0             | 0             | 0     | 28                    |
| ID5, 9                | 1675             | 1219             | 247              | 1466                  | 161           | 21               | 27                | 0             | 0             | 0     | 209                   |
| ID7, 19               | 1366             | 851              | 496              | 1347                  | 19            | 0                | 0                 | 0             | 0             | 0     | 19                    |
| ID3, 18               | 1035             | 682              | 273              | 955                   | 38            | 17               | 25                | 0             | 0             | 0     | 80                    |
| Mean s                | 1479.35          | 732.77           | 648.38           | 1381.15               | 41.62         | 16.77            | 33.73             | 3.15          | 1.96          | 0.96  | 98.19                 |
| Min, s                | 24;38            | 12;12            | 10;48            | 23;01                 | 00;42         | 00;17            | 00;34             | 00;03         | 00;02         | 00;01 | 01;38                 |
