# Supplementary material
Source: publisher figshare collection journal article supplement (https://asha.figshare.com/articles/dataset/_/25996168)
Supplement: Supplementary file 4 [file 1]

**Supplemental Material S1.** Individual-level raw and standard scores on standardised measures.

| Assessment      | ID code | Age at start | Raw score | Scaled/Standard score <sup>1</sup> |
|-----------------|---------|--------------|-----------|------------------------------------|
| SPELT           | 1       | 9.79         | 21        | <40                                |
|                 | 2       | 9.75         | 14        | <40                                |
|                 | 3       | 8.70         | 15        | <40                                |
|                 | 4       | 9.61         | 42        | 89                                 |
|                 | 5       | 8.01         | 32        | 72                                 |
|                 | 6       | 9.32         | 32        | 64                                 |
|                 | 7       | 10.89        | 30        | n/a                                |
|                 | 8       | 8.94         | 39        | 82                                 |
| ACE grammar     | 1       | 9.79         | 7         | 3                                  |
|                 | 2       | 9.75         | 2         | 3                                  |
|                 | 3       | 8.70         | 8         | 4                                  |
|                 | 4       | 9.61         | 8         | 3                                  |
|                 | 5       | 8.01         | 4         | 3                                  |
|                 | 6       | 9.32         | 5         | 3                                  |
|                 | 7       | 10.89        | 7         | 3                                  |
|                 | 8       | 8.94         | 9         | 5                                  |
| ACE information | 1       | 9.79         | 10        | 6                                  |
|                 | 2       | 9.75         | 8         | 5                                  |
|                 | 3       | 8.70         | 11        | 8                                  |
|                 | 4       | 9.61         | 10        | 6                                  |
|                 | 5       | 8.01         | 4         | 4                                  |
|                 | 6       | 9.32         | 5         | 3                                  |
|                 | 7       | 10.89        | 18        | 12                                 |
|                 | 8       | 8.94         | 5         | 4                                  |
| ERRNI MLU       | 1       | 9.79         | 5.50      | 65                                 |
|                 | 2       | 9.75         | 4.10      | 64                                 |
|                 | 3       | 8.70         | 5.50      | 69                                 |
|                 | 4       | 9.61         | 6.17      | 69                                 |
|                 | 5       | 8.01         | 5.47      | 69                                 |
|                 | 6       | 9.32         | 4.16      | 64                                 |
|                 | 7       | 10.89        | 5.26      | 64                                 |
|                 | 8       | 8.94         | 7.92      | 90                                 |
| ERRNI content   | 1       | 9.79         | 10        | 72                                 |
|                 | 2       | 9.75         | 10        | 72                                 |
|                 | 3       | 8.70         | 10        | 75                                 |
|                 | 4       | 9.61         | 6         | 65                                 |
|                 | 5       | 8.01         | 5         | 65                                 |
|                 | 6       | 9.32         | 6         | 65                                 |
|                 | 7       | 10.89        | 11        | 74                                 |
|                 | 8       | 8.94         | 11        | 75                                 |

| Assessment | ID code | Age at start | Raw score | Scaled/Standard score <sup>1</sup> |
|------------|---------|--------------|-----------|------------------------------------|
| TROG       | 1       | 9.79         | 7         | 62                                 |
|            | 2       | 9.75         | 8         | 67                                 |
|            | 3       | 8.70         | 2         | 55                                 |
|            | 4       | 9.61         | 12        | 85                                 |
|            | 5       | 8.01         | 4         | 55                                 |
|            | 6       | 9.32         | 5         | 55                                 |
|            | 7       | 10.89        | 9         | 65                                 |
|            | 8       | 8.94         | 10        | 76                                 |

<sup>1</sup>Missing standard scores indicate that norms were unavailable for the child's age at the point of testing. ACE scores are scaled scores (1SD range: 7-13), all others are standard scores (1SD range: 85-115)
